# Supplementary material for: A microporous metal–organic open framework containing uncoordinated carbonyl groups as postsynthetic modification sites for cation exchange and Tb3+ sensing
Source: Royal Society of Chemistry journal article supplement (doi:10.1039/c3cc43168a), 2013-01-01
Supplement: c3cc43168a.pdf [file c3cc43168a.pdf]

## Electronic Supporting Information for

### Microporous metal-organic open framework containing uncoordinated carbonyl groups as postsynthetic modification sites for cation exchange and Tb<sup>3+</sup> sensor

Jianwei Cao, Yanfei Gao, Yanqin Wang, Chunfang Du and Zhiliang Liu \*

*College of Chemistry and Chemical Engineering, Key Laboratory of Nanomagnetic and Functional Materials, Inner Mongolia University, 010021, Hohhot, P. R. China*

\* Corresponding author. Tel.: +86-471-4995414. E-mail: [cezlliu@imu.edu.cn](mailto:cezlliu@imu.edu.cn) (Z.-L. Liu)

#### Contents

|                                                                                                                                                                                         |   |
|-----------------------------------------------------------------------------------------------------------------------------------------------------------------------------------------|---|
| Experimental Section .....                                                                                                                                                              | 2 |
| Materials and Physical Measurements: .....                                                                                                                                              | 2 |
| H <sub>4</sub> ttca Structure .....                                                                                                                                                     | 2 |
| Preparation of MOF-COOH: .....                                                                                                                                                          | 2 |
| Crystallography: .....                                                                                                                                                                  | 3 |
| Table S1 Crystal Data and Structure Refinement for MOF-COOH.....                                                                                                                        | 4 |
| Table S2 Selected Distances and Bond Angles for MOF-COOH .....                                                                                                                          | 5 |
| Preparation of Na <sup>+</sup> @MOF-COO <sup>-</sup> and Ln <sup>3+</sup> @MOF-COO <sup>-</sup> (Ln = Sm <sup>3+</sup> , Eu <sup>3+</sup> , Dy <sup>3+</sup> or Tb <sup>3+</sup> )..... | 5 |
| Fig S1 Thermogravimetric analyses of MOF-COOH.....                                                                                                                                      | 6 |
| Fig S2 Photoluminescences of H <sub>4</sub> ttca ligand, MOF-COOH and Na <sup>+</sup> @MOF-COO <sup>-</sup> .....                                                                       | 6 |
| Fig S3 CO <sub>2</sub> (298K) sorption isotherms for MOF-COOH. ....                                                                                                                     | 7 |
| Fig S4 N <sub>2</sub> (77K) sorption isotherms for MOF-COOH.....                                                                                                                        | 7 |
| Fig S5 The excitation spectrum. ....                                                                                                                                                    | 8 |
| Fig S6 IR spectrum. ....                                                                                                                                                                | 9 |

## Experimental Section

### Materials and Physical Measurements:

All reagents and solvents were used as received from commercial supplies without further purification. Fourier transform infrared (FTIR) spectra (KBr disk) were measured with a Vertex 70 FTIR on a spectrophotometer (4000–400  $\text{cm}^{-1}$ ). Elemental analyses for C, H and N were obtained from a Perkin-Elmer 2400 elemental analyzer. The TG curves were recorded on a STA409PC Thermal analyzer in the  $\text{N}_2$  atmosphere and at a heating rate of  $10^\circ\text{C}/\text{min}$  in the temperature range of 20~800  $^\circ\text{C}$ . Powder X-ray diffraction pattern (PXRD) was carried out on a EMPYREAN PANALYTICAL apparatus. The luminescence spectra for the powdered solid samples were measured at room temperature on a FLS920 fluorescence spectrophotometer. The excitation slit and the emission slit were 0.5 nm.

### Structure of $\text{H}_4\text{ttca}$ Ligand

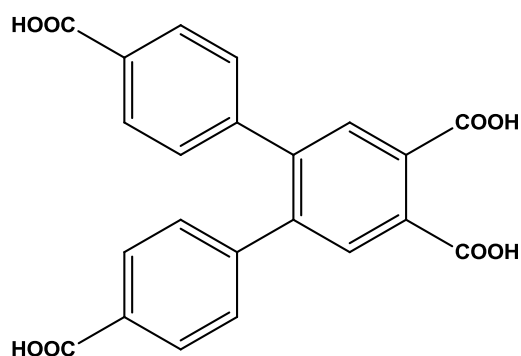

[1,1':2',1'']-terphenyl]-4,4',4'',5'-tetracarboxylic acid( $\text{H}_4\text{ttca}$ )

### Preparation of MOF-COOH:

To synthesize the title compound, a mixture of  $\text{Zn}(\text{ClO}_4)_2 \cdot 6\text{H}_2\text{O}$  (223 mg, 0.6 mmol),  $\text{H}_4\text{ttca}$  (120 mg, 0.3 mmol), 4,4'-bpy (94 mg, 0.6 mmol) in molar ratio 2 : 1 : 2 was dissolved in water (12 mL), then the solution was adjusted to pH 5.0 with 1 M NaOH solution, finally, it was placed in a 25 mL stainless steel reactor with a Teflon liner and heated to 160  $^\circ\text{C}$ . The temperature was held for 120 h, then the reaction system was gradually cooled to room temperature at a rate of 5  $^\circ\text{C}/\text{h}$ .

White block crystals of MOF-COOH were obtained with a yield of 61%(based on  $\text{Zn}(\text{ClO}_4)_2 \cdot 6\text{H}_2\text{O}$ ). Anal. Calcd. (found) for  $\text{Zn}_3\text{C}_{54}\text{H}_{34}\text{O}_{18}\text{N}_2$  ( $M_w = 1194.94$ ): C, 54.27 (54.21); H, 2.87 (2.60); N, 2.34 (2.32) %. IR (KBr,  $\text{cm}^{-1}$ ) = 3475(m), 3418(s), 3120(vs), 1720(s), 1597(s), 1543(s), 1463(s), 1398(s), 1281(m), 1226(s), 1074(w), 1009(w), 812(m), 712(m), 631(m), 469(w).

### Crystallography:

Crystallographic data of MOF-COOH were collected on a SuperNova single crystal diffractometer equipped with graphite-monochromatic Mo K $\alpha$  radiation ( $\lambda = 0.71073 \text{ \AA}$ ). The data integration and empirical absorption correction were carried out by SAINT program. The crystal was kept at 153(2) K during data collection. Using Olex2,<sup>S1</sup> the structure was solved with the XS<sup>S2</sup> structure solution program using Direct Methods and refined with the XL<sup>S3</sup> refinement package using Least Squares minimization. All hydrogen atoms in these coordination polymers were generated geometrically and refined isotropically using the riding model. Crystallographic data and structure refinement parameters for MOF-COOH are listed in Table S1. Selected Distances and Bond Angles for MOF-COOH are listed in Table S2.

### Reference:

- S1. O. V. Dolomanov, L. J. Bourhis, R. J. Gildea, J. A. K. Howard and H. Puschmann, OLEX2: a complete structure solution, refinement and analysis program. *J. Appl. Cryst.* 2009. **42**, 339-341.
- S2. *SHELXS-97*. (Sheldrick, 1990)
- S3. XL, G.M. Sheldrick, *Acta Cryst.* (2008). **A64**, 112-122

**Table S1.** Crystal Data and Structure Refinement for MOF-COOH

| Identification code                         | MOF-COOH                                                                       |
|---------------------------------------------|--------------------------------------------------------------------------------|
| Empirical formula                           | C <sub>54</sub> H <sub>34</sub> N <sub>2</sub> O <sub>18</sub> Zn <sub>3</sub> |
| Formula weight                              | 1194.94                                                                        |
| Temperature/K                               | 153(2)                                                                         |
| Crystal system                              | triclinic                                                                      |
| Space group                                 | P $\bar{1}$                                                                    |
| a/Å                                         | 10.2304(13)                                                                    |
| b/Å                                         | 10.5293(13)                                                                    |
| c/Å                                         | 13.0853(14)                                                                    |
| $\alpha$ /°                                 | 100.836(10)                                                                    |
| $\beta$ /°                                  | 90.736(9)                                                                      |
| $\gamma$ /°                                 | 113.420(12)                                                                    |
| Volume/Å <sup>3</sup>                       | 1264.3(3)                                                                      |
| Z                                           | 1                                                                              |
| $\rho_{\text{calc}}$ /mg/mm <sup>3</sup>    | 1.564                                                                          |
| m/mm <sup>-1</sup>                          | 1.490                                                                          |
| F(000)                                      | 602.0                                                                          |
| 2 $\Theta$ range for data collection        | 5.14 to 50°                                                                    |
| Index ranges                                | -12 ≤ h ≤ 6, -12 ≤ k ≤ 12, -15 ≤ l ≤ 15                                        |
| Reflections collected                       | 7884                                                                           |
| Independent reflections                     | 4462[R(int) = 0.1044]                                                          |
| Data/restraints/parameters                  | 4462/371/350                                                                   |
| Goodness-of-fit on F <sup>2</sup>           | 0.992                                                                          |
| Final R indexes [I >= 2 $\sigma$ (I)]       | R <sub>1</sub> = 0.0847, wR <sub>2</sub> = 0.1659                              |
| Final R indexes [all data]                  | R <sub>1</sub> = 0.1550, wR <sub>2</sub> = 0.2137                              |
| Largest diff. peak/hole / e Å <sup>-3</sup> | 1.35/-0.92                                                                     |

**Table S2.** Selected Distances and Bond Angles for MOF-COOH

| MOF-COOH                             |          |                                      |          |
|--------------------------------------|----------|--------------------------------------|----------|
| Distances [Å]                        |          |                                      |          |
| Zn1- O6 <sup>B</sup>                 | 2.070(6) | Zn2- O3                              | 2.105(6) |
| Zn1- O8 <sup>C</sup>                 | 2.055(5) | Zn2- O5 <sup>A</sup>                 | 2.139(6) |
| Zn1- O9                              | 2.211(6) | Zn2 <sup>C</sup> - O7                | 1.948(6) |
| Zn2- N1                              | 2.062(8) | Zn2- O9                              | 2.057(6) |
| Angles [°]                           |          |                                      |          |
| O6 <sup>B</sup> -Zn1-O9              | 86.4(2)  | O7 <sup>C</sup> -Zn2-N1              | 119.1(3) |
| O6 <sup>A</sup> -Zn1-O9              | 93.6(2)  | O7 <sup>C</sup> -Zn2-O3              | 87.8(2)  |
| O8 <sup>C</sup> -Zn1-O6 <sup>A</sup> | 91.8(2)  | O7 <sup>C</sup> -Zn2-O5 <sup>A</sup> | 97.0(2)  |
| O8 <sup>C</sup> -Zn1-O6 <sup>B</sup> | 88.2(2)  | O7 <sup>C</sup> -Zn2-O9              | 122.3(2) |
| O8 <sup>C</sup> -Zn1-O9              | 89.0(2)  | O9-Zn2-N1                            | 118.5(3) |
| O8 <sup>E</sup> -Zn1-O9              | 91.0(2)  | O9-Zn2-O3                            | 88.1(2)  |
| N1-Zn2-O3                            | 91.6(3)  | O9-Zn2-O5 <sup>A</sup>               | 85.9(2)  |
| N1-Zn2-O5 <sup>A</sup>               | 89.5(3)  |                                      |          |

Symmetry code: A  $-1+x, -1+y, -1+z$ ; B  $2-x, 1-y, 2-z$ ; C  $1-x, -y, 2-z$ ; D  $x, y, -1+z$ ; E  $1-x, -y, 1-z$ .

### Preparation of Na<sup>+</sup>@MOF-COO<sup>-</sup> and Ln<sup>3+</sup>@MOF-COO<sup>-</sup> (Ln = Sm<sup>3+</sup>, Eu<sup>3+</sup>, Dy<sup>3+</sup> or Tb<sup>3+</sup>)

One solution of MeONa in MeOH (0.05 M) and the other of Ln<sup>3+</sup> nitrate in MeOH (0.1 M) both were prepared in advance. Ln<sup>3+</sup> cation exchange process is carried out in the following manner: a) the MOF-COOH (0.2 mmol, 0.3g) was soaked with MeONa solution (20 ml), held for 120 h, then washed with MeOH five times and removed solution; b) the material was soaked in the Ln<sup>3+</sup> nitrate solution (6 ml), held for 24 h, then refreshed the Ln<sup>3+</sup> nitrate solution, repeated the procedure in total of 15 times; c) After cation exchange was completed, the materials were thoroughly washed with MeOH for five times, then soaked in MeOH for 24 h, and the solution was removed in the end. After completion of this procedure, XRD patterns were collected for each cation-exchanged material (Fig 3).

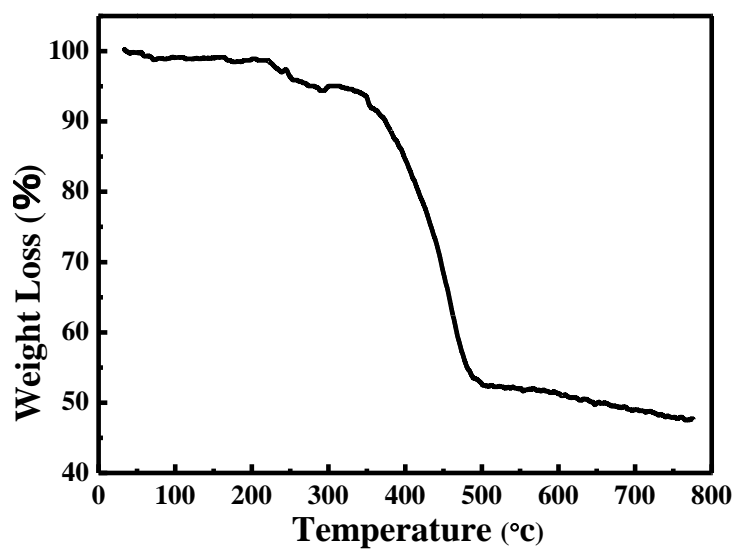

**Fig S1.** Thermogravimetric analyses of MOF-COOH.

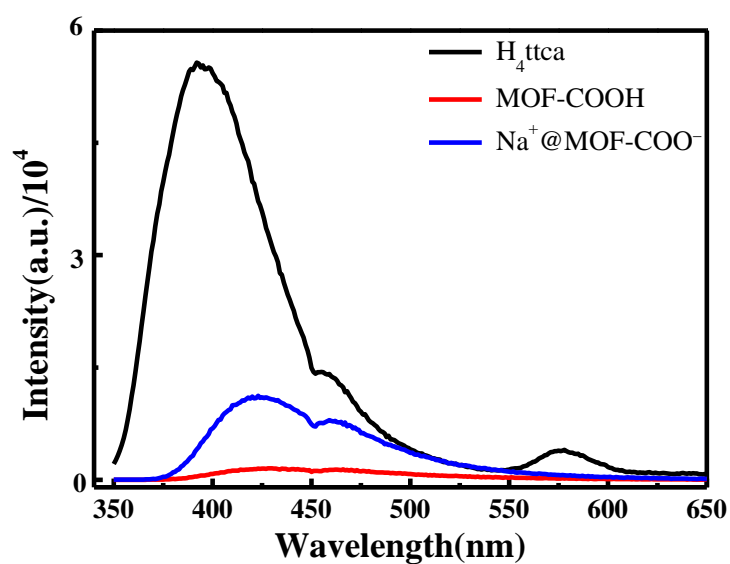

**Fig S2.** Photoluminescences of  $H_4ttca$  ligand, MOF-COOH and  $Na^+@MOF-COO^-$ .

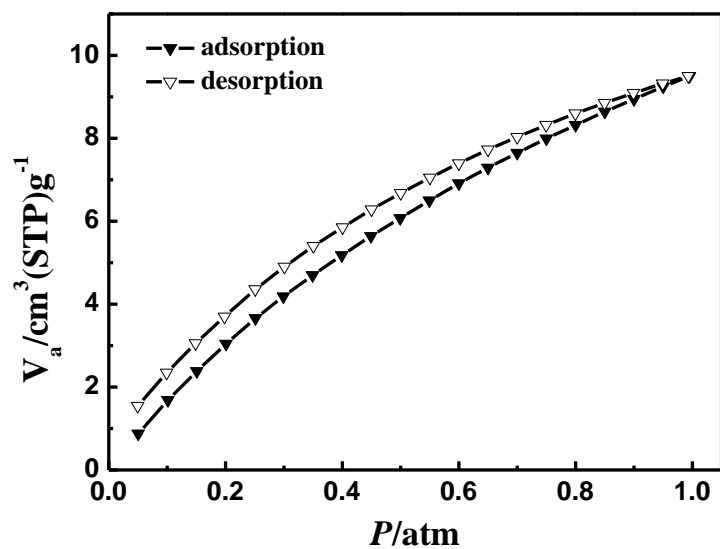

**Fig S3.** CO<sub>2</sub> (298K) sorption isotherms for MOF-COOH.

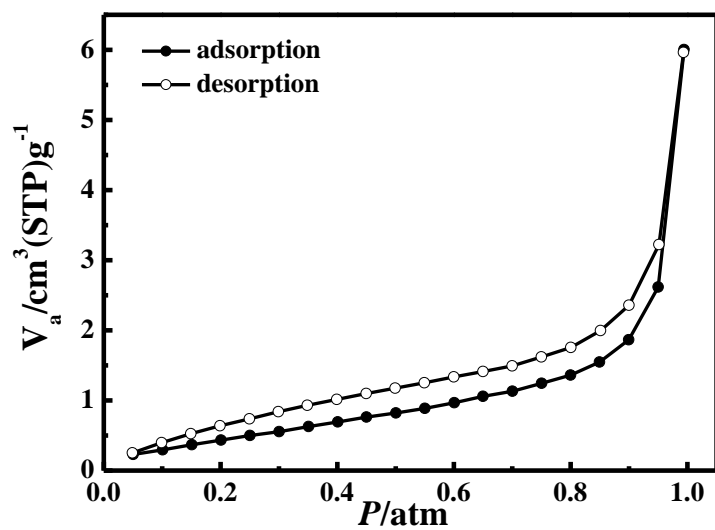

**Fig S4.** N<sub>2</sub> (77K) sorption isotherms for MOF-COOH.

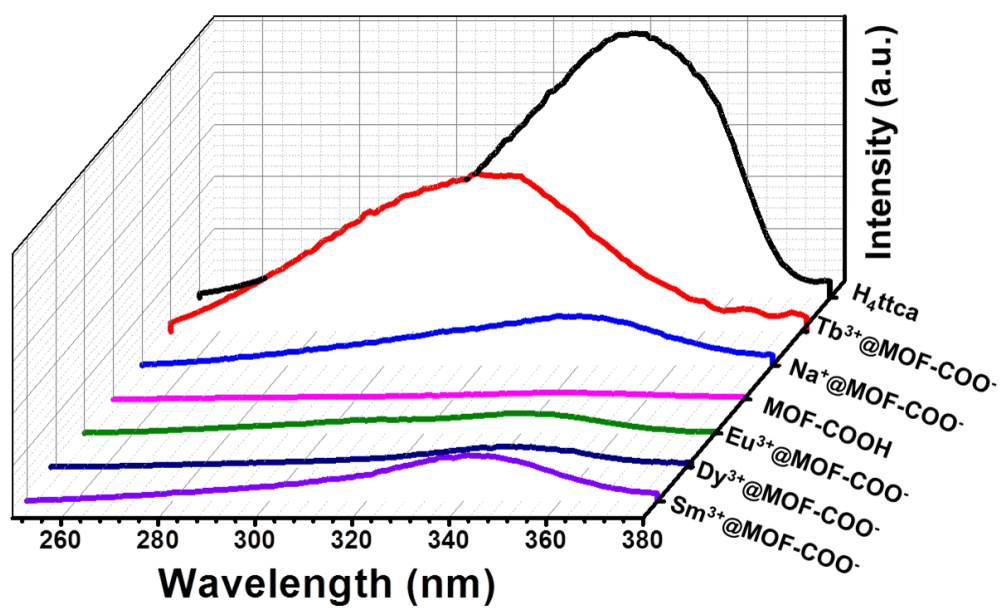

**Fig S5.** The excitation spectrum of  $H_4ttca$  ligand,  $MOF-COOH$ ,  $Na^+@MOF-COO^-$  and  $Ln^{3+}@MOF-COO^-$ .

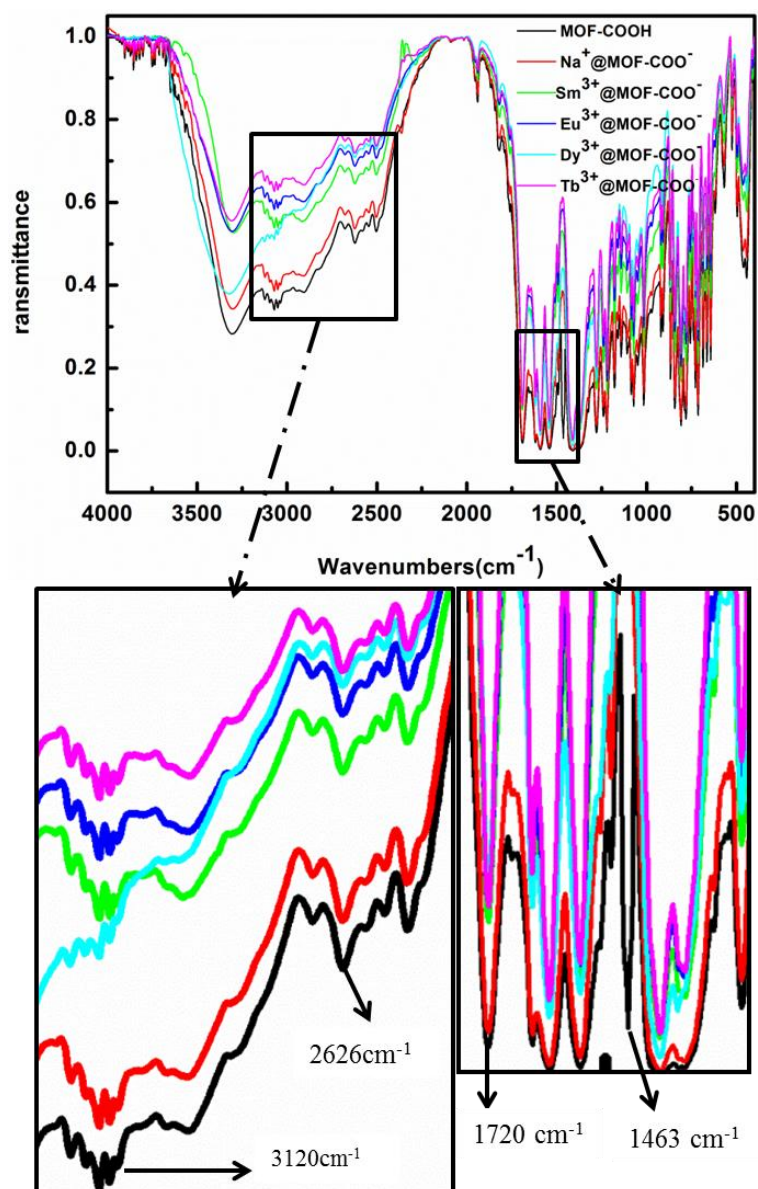

**Fig. S6.** IR spectra of MOF-COOH, Na<sup>+</sup>@MOF-COO<sup>-</sup> and Ln<sup>3+</sup>@MOF-COO<sup>-</sup> (Ln = Sm<sup>3+</sup>, Dy<sup>3+</sup>, Eu<sup>3+</sup> or Tb<sup>3+</sup>).

IR spectra of MOF-COOH and Ln<sup>3+</sup>@MOF-COO<sup>-</sup> indicate that lanthanide cations incorporated into the pores of MOF. For MOF-COOH, characteristic absorption peaks at 1463 cm<sup>-1</sup> and ~3000 cm<sup>-1</sup> attributing to the free carbonyl O-H groups appears. While, for the cations exchanged MOFs (Ln<sup>3+</sup>@MOF-COO<sup>-</sup> or Na<sup>+</sup>@MOF-COO<sup>-</sup>), these characteristic absorption peaks become much weaker. In addition, the strong absorption at 1720 cm<sup>-1</sup> belongs to stretching vibrations of carbonyl C=O group changed weaker due to the coordination effect between Ln<sup>3+</sup> and the carbonyl groups
